# Supplementary material for: Heat Stress Reduces the Susceptibility of Caenorhabditis elegans to Orsay Virus Infection
Source: MDPI journal article supplement (doi:10.3390/genes12081161), 2021-07-28
Supplement: s1 [file s1]

# Supplementary files

A

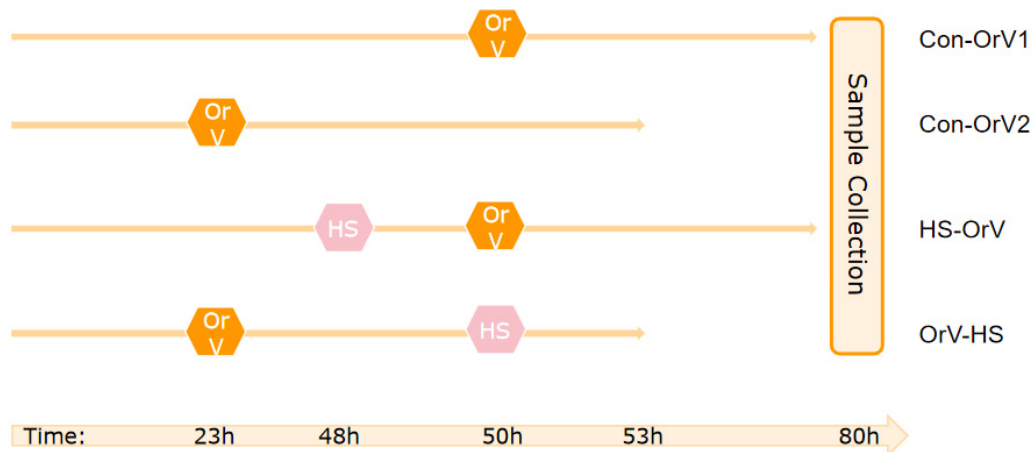

B

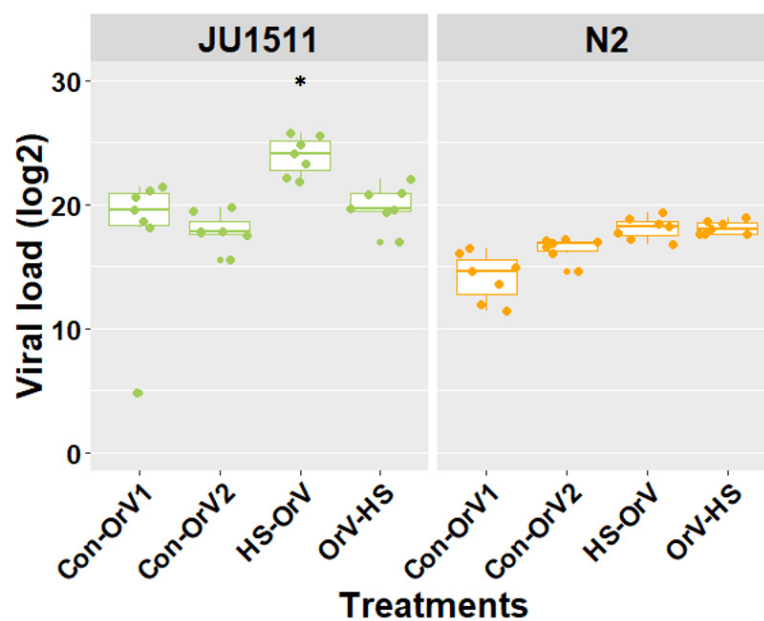

**Figure S1:** N2 and JU1511 under combined stressors (A: timeline of this trial experiment. B: Viral load of N2 and JU1511 under different treatments. Dots: biological replicates. Asterisk: Comparing with Con-OrV1, JU1511 has significant increase (Tukey HSD test,  $*p < 0.05$ .)

**A**

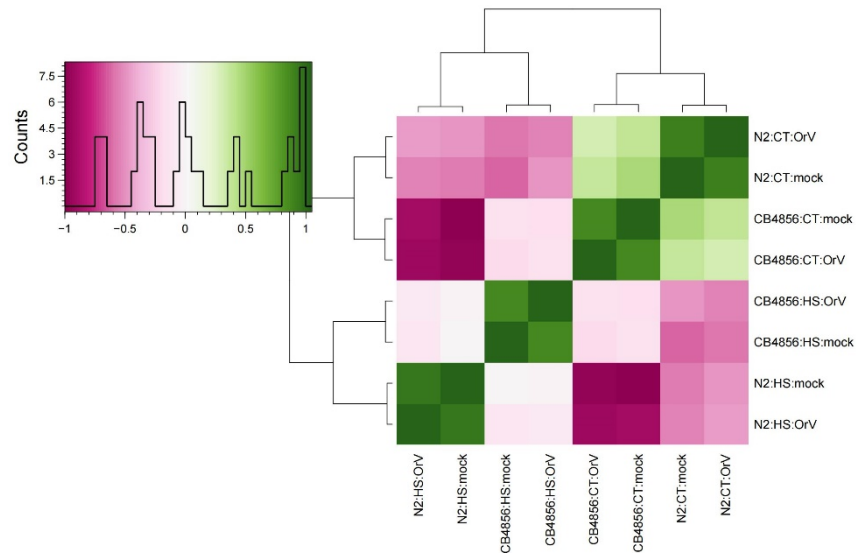

**B**

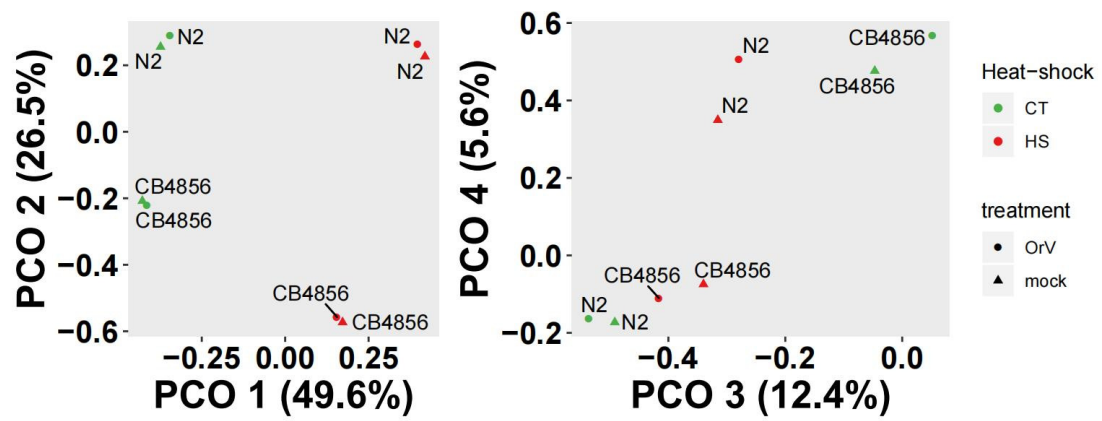

**Figure S2:** Correlation check (A) and principal component analysis (B) of microarray data.

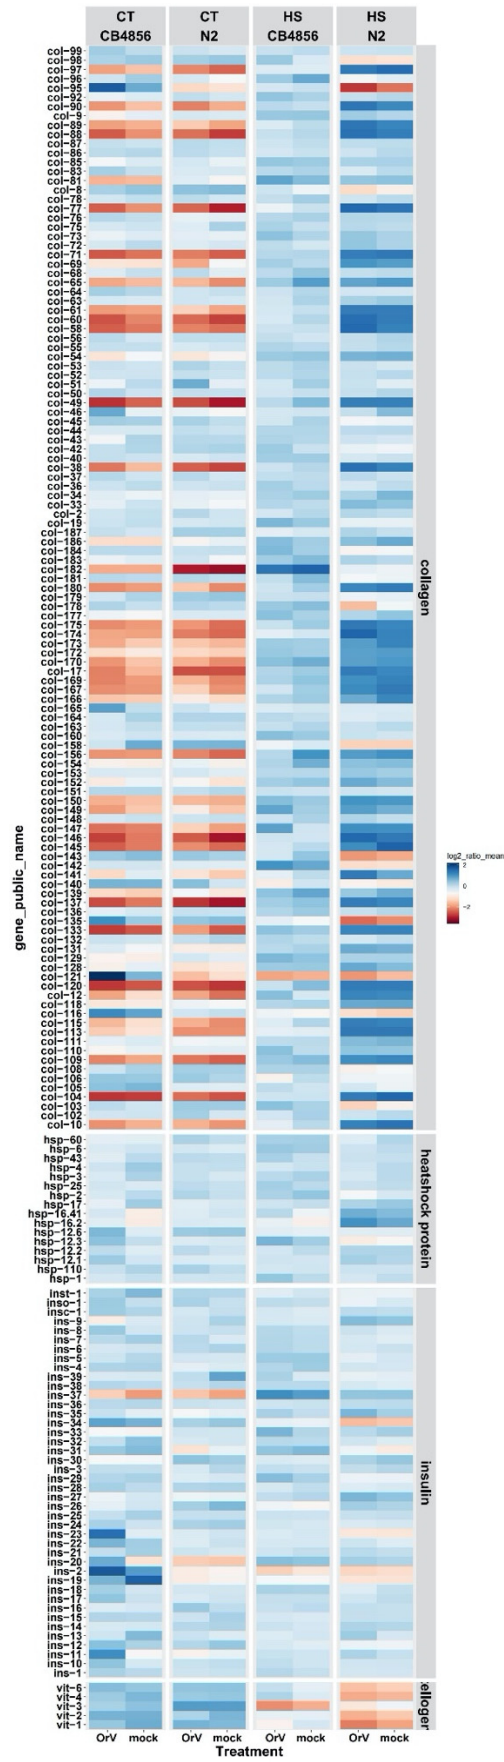

**Figure S3:** Heat map showing the expression log<sub>2</sub> mean ratio of genes associated with heat stress response and Orsay virus infection.

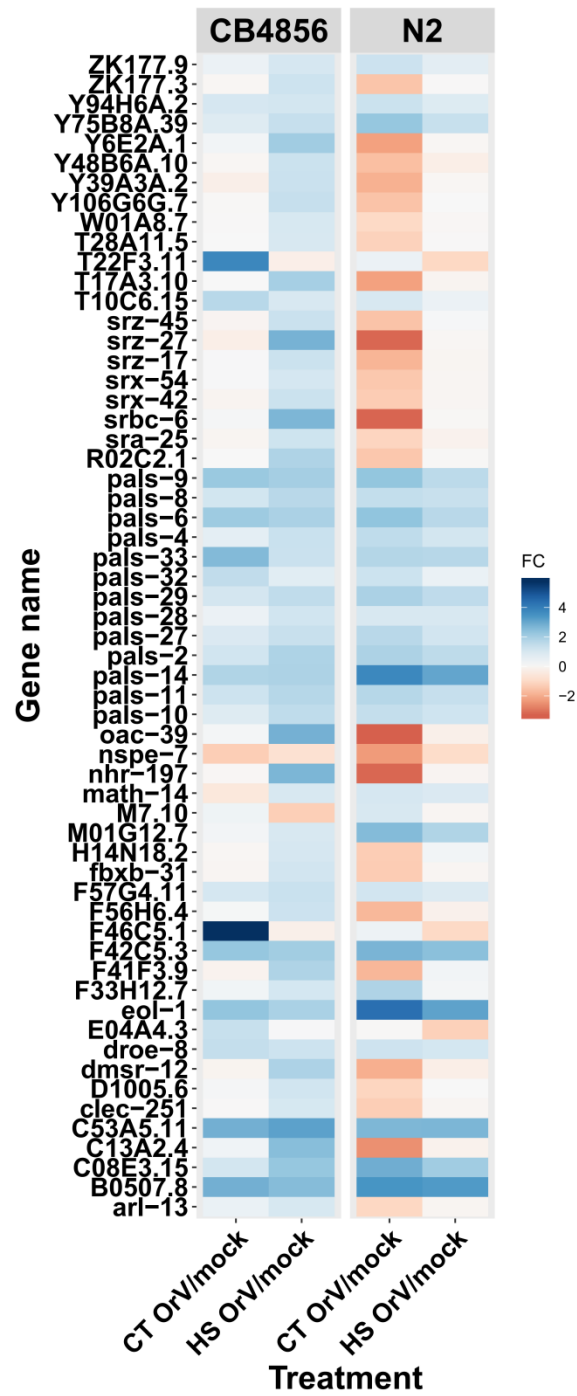

**Figure S4:** Heat map of overlapping genes differentially expressed in both genotypes (FC: fold change).

| PCR Primer      | Sequence (5'-3')     |
|-----------------|----------------------|
| hsp-12.3_PCR_F  | AAAATTGTGGCCACCAAAAA |
| hsp-12.3_PCR_R  | ATTTCGTTGCTCATTGGTCC |
| hsp-1_PCR_F     | GTTTTCATGCACGGAAAGGT |
| hsp-1_PCR_R     | CCTCAACCCCTGGCATAATA |
| hsp-16.48_PCR_F | GTAAGGCTTTCTGCCGTTTG |
| hsp-16.48_PCR_R | TGAGGGCCCTGTAGAAGTTG |
| npr-1_PCR_F     | GATCAATTCTCCGGCTCAG  |
| npr-1_PCR_R     | GGCCAAATGGAAGTTGAAAA |
| hsp-12.6_PCR_F  | TTCGAAGCTCAATGAACGAA |
| hsp-12.6_PCR_R  | AGCCCAAGATGACAATGGAC |

**Table S2:** Primers used in mutant PCR check (F: forward primer; R: reverse primer)

| qPCR Primer | Sequence (5'-3')           |
|-------------|----------------------------|
| pals-22_F   | TTTAAATCTTGAAAGTGACCGCTGGG |
| pals-22_R   | ACTCTCTGTTGTCGTCTTGCAAAATT |
| pals-25_F   | TGCAATCCGAAGATTGGTGA       |
| pals-25_R   | AAATTCTAACTTGCTCAGCATGGA   |
| pals-6_F    | TGGGTTCTGGATCAAGCAAAT      |
| pals-6_R    | TGTTCTAGAGCTGCCTGTCTCTG    |
| pals-14_F   | TCGGGAAAGCATCAATGAACTGC    |
| pals-14_R   | TGTTGTGCCTCTCCTCTGCC       |

**Table S3:** Primers used in qPCR for *pals* genes (F: forward primer; R: reverse primer)

| qPCR Primer  | Sequence (5'-3')     |
|--------------|----------------------|
| pOrV-RNA1.1F | ATACTCTACGACCTTGTCGG |
| pOrV-RNA1.1R | CTCGGTTGATGTTCTTCCAG |
| pOrV-RNA1.2F | AACCAGGAAACACTACTCCG |
| pOrV-RNA1.2R | GTTGTGATATCGCTTGGTGG |
| pY37E3.8F    | GCGTTTGTGGTCTCTTGTC  |
| pY37E3.8R    | CTCTGGGAGGAGTCCTTTTC |
| pRPL6-F      | TGTCACCTCTCCGCAAGAC  |
| pRPL6-R      | TGATCTTGTGTGGTCCAGTG |

**Table S4:** Primers used in qPCR for viral test (F: forward primer; R: reverse primer)
